# Supplementary material for: New Obolenskvirus Phages Brutus and Scipio: Biology, Evolution, and Phage-Host Interaction
Source: MDPI journal article supplement (doi:10.3390/ijms25042074), 2024-02-08
Supplement: s1 [file s1]

**Figure S3.** The  $^{13}\text{C}$  NMR spectrum of the **oligosaccharide 1 (OS1)** obtained after cleavage of K82 CPS of *A. baumannii* LUH5534 with recombinant protein Scipio\_gp39.

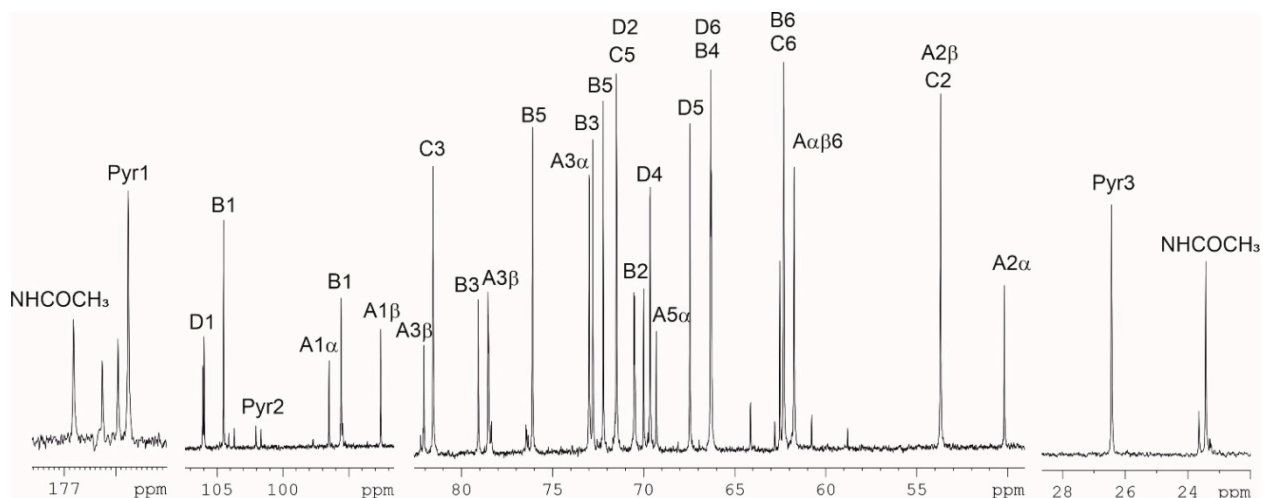

**Figure S4.** The positive ion mode HR ESI mass spectrum of the OS1.

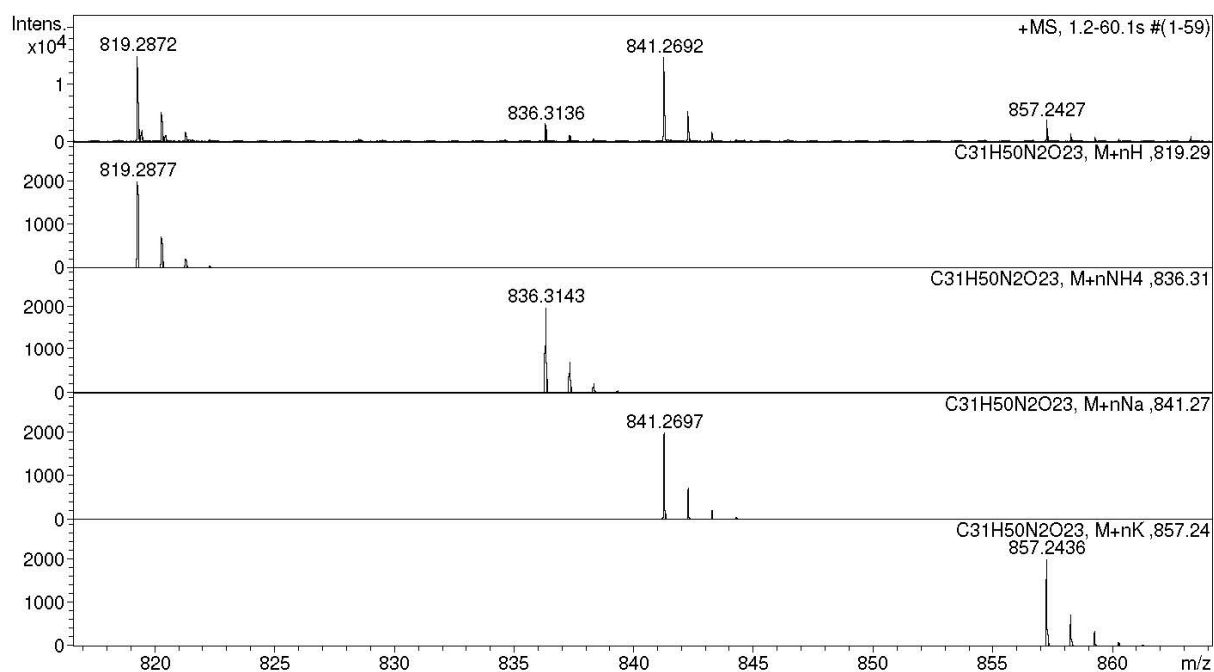

**Table S1.** Results of ANI calculations with orthoANIu using genomes of phages Brutus and Scipio compare to 19,460 *Caudoviricetes* phage sequences contained in the NCBI Genome. Cells with the coverage values of 0.16 and more is highlighted with red background.

| NCBI Accession | ANI   | Aligned length, nt | Coverage genome 1 | Coverage genome 2 | Genome size, nt | NCBI Name                                  | NCBI Taxonomy            |
|----------------|-------|--------------------|-------------------|-------------------|-----------------|--------------------------------------------|--------------------------|
| phage Brutus   |       |                    |                   |                   |                 |                                            |                          |
| MG366114       | 92.36 | 7076               | 0.1613            | 0.1692            | 41820           | <i>Acinetobacter</i> phage PBAB08          | <i>Myoviridae</i>        |
| OP585104       | 92.35 | 13850              | 0.3158            | 0.3158            | 43860           | <i>Acinetobacter</i> phage vB_AbaM_BP10    | <i>Obolenskiviridae</i>  |
| MN516421       | 90.47 | 18032              | 0.4111            | 0.4111            | 43860           | <i>Acinetobacter</i> phage Bphi-R2919      | <i>Obolenskiviridae</i>  |
| MZ593728       | 90.34 | 16165              | 0.3686            | 0.3602            | 44880           | <i>Acinetobacter</i> phage BUCT628         | <i>Obolenskiviridae</i>  |
| MZ618622       | 90.24 | 21498              | 0.4902            | 0.5018            | 42840           | <i>Acinetobacter</i> phage Abp95           | <i>Obolenskiviridae</i>  |
| MN166083       | 90.22 | 19858              | 0.4528            | 0.4528            | 43860           | <i>Acinetobacter</i> phage Abp9            | <i>Obolenskiviridae</i>  |
| KY829116       | 89.96 | 18862              | 0.4301            | 0.4203            | 44880           | <i>Acinetobacter</i> phage WCHABP1         | <i>Obolenskiviridae</i>  |
| OM471864       | 89.86 | 14484              | 0.3302            | 0.3227            | 44880           | <i>Acinetobacter</i> phage Cato            | <i>Obolenskiviridae</i>  |
| MN807295       | 89.70 | 700                | 0.0160            | 0.0172            | 40800           | <i>Acinetobacter</i> phage vB_AbaP_APK116  | <i>Autographiviridae</i> |
| HM368260       | 89.67 | 15024              | 0.3425            | 0.3348            | 44880           | <i>Acinetobacter</i> phage AB1             | <i>Obolenskiviridae</i>  |
| JX976549       | 89.62 | 17528              | 0.3996            | 0.4092            | 42840           | <i>Acinetobacter</i> phage vB_AbaM-IME-AB2 | <i>Obolenskiviridae</i>  |
| ON480525       | 89.42 | 18710              | 0.4266            | 0.4266            | 43860           | <i>Acinetobacter</i> phage SHI             | <i>Obolenskiviridae</i>  |
| KJ817802       | 89.33 | 17000              | 0.3876            | 0.3876            | 43860           | <i>Acinetobacter</i> phage YMC-13-01-C62   | <i>Obolenskiviridae</i>  |
| MZ712044       | 89.17 | 17473              | 0.3984            | 0.3807            | 45900           | <i>Acinetobacter</i> phage BUCT629         | <i>Obolenskiviridae</i>  |
| ON237674       | 89.03 | 16122              | 0.3676            | 0.3592            | 44880           | <i>Acinetobacter</i> phage Arbor           | <i>Obolenskiviridae</i>  |
| MN516422       | 88.95 | 18947              | 0.4320            | 0.4320            | 43860           | <i>Acinetobacter</i> phage Bphi-R1888      | <i>Obolenskiviridae</i>  |
| KP861231       | 88.70 | 18160              | 0.4140            | 0.4140            | 43860           | <i>Acinetobacter</i> phage YMC11/12/R1215  | <i>Obolenskiviridae</i>  |
| ON036883       | 88.68 | 15460              | 0.3525            | 0.3525            | 43860           | <i>Acinetobacter</i> phage Scipio          | <i>Obolenskiviridae</i>  |
| MH853788       | 88.57 | 20282              | 0.4624            | 0.4419            | 45900           | <i>Acinetobacter</i> phage vB_AbaM_IME512  | <i>Obolenskiviridae</i>  |
| MF346584       | 88.54 | 18159              | 0.4140            | 0.4046            | 44880           | <i>Acinetobacter</i> phage AbP2            | <i>Obolenskiviridae</i>  |
| HE806280       | 88.29 | 14079              | 0.3210            | 0.3067            | 45900           | <i>Acinetobacter</i> phage AP22            | <i>Obolenskiviridae</i>  |
| KP861229       | 88.16 | 17225              | 0.3927            | 0.3927            | 43860           | <i>Acinetobacter</i> phage YMC11/12/R2315  | <i>Obolenskiviridae</i>  |
| KU510289       | 87.69 | 18851              | 0.4298            | 0.4200            | 44880           | <i>Acinetobacter</i> phage LZ35            | <i>Obolenskiviridae</i>  |
| MH853787       | 87.47 | 17005              | 0.3877            | 0.3969            | 42840           | <i>Acinetobacter</i> phage vB_AbaM_IME284  | <i>Obolenskiviridae</i>  |
| KY670595       | 87.39 | 23917              | 0.5453            | 0.5329            | 44880           | <i>Acinetobacter</i> phage WCHABP12        | <i>Obolenskiviridae</i>  |
| OL743187       | 87.17 | 16174              | 0.3688            | 0.3688            | 43860           | <i>Acinetobacter</i> phage vB_AbM_WUPSU    | <i>Obolenskiviridae</i>  |
| MH853786       | 87.06 | 20188              | 0.4603            | 0.4498            | 44880           | <i>Acinetobacter</i> phage vB_AbaM_IME285  | <i>Obolenskiviridae</i>  |
| JX560521       | 72.88 | 8349               | 0.1904            | 0.1949            | 42840           | <i>Acinetobacter</i> phage phiAC-1         | <i>Myoviridae</i>        |
| MN855951       | 69.80 | 567                | 0.0129            | 0.0695            | 8160            | <i>Siphoviridae</i> sp.                    | <i>Siphoviridae</i>      |
| MN855957       | 66.85 | 1108               | 0.0253            | 0.0572            | 19380           | <i>Myoviridae</i> sp.                      | <i>Myoviridae</i>        |
| KP137437       | 66.70 | 561                | 0.0128            | 0.0108            | 52020           | <i>Mannheimia</i> phage vB_MhS_1152AP2     | <i>Siphoviridae</i>      |
| KP137435       | 65.70 | 561                | 0.0128            | 0.0117            | 47940           | <i>Mannheimia</i> phage vB_MhS_587AP2      | <i>Siphoviridae</i>      |
| KP137433       | 65.30 | 561                | 0.0128            | 0.0112            | 49980           | <i>Mannheimia</i> phage vB_MhS_535AP2      | <i>Siphoviridae</i>      |
| KP137439       | 65.30 | 561                | 0.0128            | 0.0108            | 52020           | <i>Mannheimia</i> phage vB_MhS_3927AP1     | <i>Siphoviridae</i>      |
| MT664721       | 64.60 | 828                | 0.0189            | 0.0232            | 35700           | <i>Escherichia</i> phage vB_EcoM_APEC      | <i>Podoviridae</i>       |
| MN856055       | 64.35 | 1397               | 0.0319            | 0.0351            | 39780           | <i>Myoviridae</i> sp.                      | <i>Myoviridae</i>        |
| KF669656       | 63.60 | 1342               | 0.0306            | 0.0337            | 39780           | <i>Acinetobacter</i> phage Petty           | <i>Autographiviridae</i> |
| MN856093       | 60.60 | 720                | 0.0164            | 0.0543            | 13260           | <i>Myoviridae</i> sp.                      | <i>Myoviridae</i>        |
| MN856091       | 60.40 | 674                | 0.0154            | 0.0245            | 27540           | <i>Myoviridae</i> sp.                      | <i>Myoviridae</i>        |
| MT028491       | 59.70 | 653                | 0.0149            | 0.0029            | 227460          | <i>Ochrobactrum</i> phage vB_OspM_OC       | <i>Myoviridae</i>        |
| MN856109       | 56.50 | 762                | 0.0174            | 0.1067            | 7140            | <i>Myoviridae</i> sp.                      | <i>Myoviridae</i>        |
| MN856004       | 54.00 | 756                | 0.0172            | 0.0176            | 42840           | <i>Myoviridae</i> sp.                      | <i>Myoviridae</i>        |

| phage Scipio |       |       |        |        |       |                                             |                              |
|--------------|-------|-------|--------|--------|-------|---------------------------------------------|------------------------------|
| MZ712044     | 91.76 | 13421 | 0.3060 | 0.2924 | 45900 | <i>Acinetobacter</i> phage BUCT629          | <i>Obolenskovirus</i>        |
| KU510289     | 89.95 | 13900 | 0.3169 | 0.3097 | 44880 | <i>Acinetobacter</i> phage LZ35             | <i>Obolenskovirus</i>        |
| MH853788     | 89.78 | 20329 | 0.4635 | 0.4429 | 45900 | <i>Acinetobacter</i> phage vB_AbaM_IME512   | <i>Obolenskovirus</i>        |
| ON480525     | 89.74 | 18529 | 0.4225 | 0.4225 | 43860 | <i>Acinetobacter</i> phage SHI              | <i>Obolenskovirus</i>        |
| JX976549     | 89.73 | 12816 | 0.2922 | 0.2992 | 42840 | <i>Acinetobacter</i> phage vB_AbaM-IME-AB2  | <i>Obolenskovirus</i>        |
| KY670595     | 89.49 | 15520 | 0.3539 | 0.3458 | 44880 | <i>Acinetobacter</i> phage WCHABP12         | <i>Obolenskovirus</i>        |
| ON036882     | 89.37 | 13748 | 0.3135 | 0.3063 | 44880 | <i>Acinetobacter</i> phage Brutus           | <i>Obolenskovirus</i>        |
| KP861229     | 89.33 | 13371 | 0.3049 | 0.3049 | 43860 | <i>Acinetobacter</i> phage YMC11/12/R2315   | <i>Obolenskovirus</i>        |
| MN516422     | 89.29 | 11937 | 0.2722 | 0.2722 | 43860 | <i>Acinetobacter</i> phage Bphi-R1888       | <i>Obolenskovirus</i>        |
| MN516421     | 89.18 | 12472 | 0.2844 | 0.2844 | 43860 | <i>Acinetobacter</i> phage Bphi-R2919       | <i>Obolenskovirus</i>        |
| KP861231     | 89.18 | 10826 | 0.2468 | 0.2468 | 43860 | <i>Acinetobacter</i> phage YMC11/12/R1215   | <i>Obolenskovirus</i>        |
| MF346584     | 88.78 | 14478 | 0.3301 | 0.3226 | 44880 | <i>Acinetobacter</i> phage AbP2             | <i>Obolenskovirus</i>        |
| MH853787     | 88.66 | 14908 | 0.3399 | 0.3480 | 42840 | <i>Acinetobacter</i> phage vB_AbaM_IME284   | <i>Obolenskovirus</i>        |
| KY829116     | 88.54 | 20295 | 0.4627 | 0.4522 | 44880 | <i>Acinetobacter</i> phage WCHABP1          | <i>Obolenskovirus</i>        |
| MZ593728     | 88.43 | 14472 | 0.3300 | 0.3225 | 44880 | <i>Acinetobacter</i> phage BUCT628          | <i>Obolenskovirus</i>        |
| OL743187     | 88.35 | 15110 | 0.3445 | 0.3445 | 43860 | <i>Acinetobacter</i> phage vB_AbM_WUPSU     | <i>Obolenskovirus</i>        |
| HM368260     | 87.69 | 17485 | 0.3987 | 0.3896 | 44880 | <i>Acinetobacter</i> phage AB1              | <i>Obolenskovirus</i>        |
| OM471864     | 87.68 | 16067 | 0.3663 | 0.3580 | 44880 | <i>Acinetobacter</i> phage Cato             | <i>Obolenskovirus</i>        |
| MN166083     | 87.54 | 21070 | 0.4804 | 0.4804 | 43860 | <i>Acinetobacter</i> phage Abp9             | <i>Obolenskovirus</i>        |
| MZ618622     | 87.53 | 12777 | 0.2913 | 0.2982 | 42840 | <i>Acinetobacter</i> phage Abp95            | <i>Obolenskovirus</i>        |
| HE806280     | 87.24 | 17233 | 0.3929 | 0.3754 | 45900 | <i>Acinetobacter</i> phage AP22             | <i>Obolenskovirus</i>        |
| MG366114     | 87.13 | 7042  | 0.1606 | 0.1684 | 41820 | <i>Acinetobacter</i> phage PBAB08           | <i>Myoviridae</i>            |
| MH853786     | 86.99 | 11154 | 0.2543 | 0.2485 | 44880 | <i>Acinetobacter</i> phage vB_AbaM_IME285   | <i>Obolenskovirus</i>        |
| KJ817802     | 86.61 | 11909 | 0.2715 | 0.2715 | 43860 | <i>Acinetobacter</i> phage YMC-13-01-C62    | <i>Obolenskovirus</i>        |
| ON237674     | 86.43 | 18503 | 0.4219 | 0.4123 | 44880 | <i>Acinetobacter</i> phage Arbor            | <i>Obolenskovirus</i>        |
| OP585104     | 85.73 | 16683 | 0.3804 | 0.3804 | 43860 | <i>Acinetobacter</i> phage vB_AbaM_BP10     | <i>Obolenskovirus</i>        |
| JX560521     | 70.87 | 12531 | 0.2857 | 0.2925 | 42840 | <i>Acinetobacter</i> phage phiAC-1          | <i>Myoviridae</i>            |
| JF974295     | 67.60 | 525   | 0.0120 | 0.0129 | 40800 | <i>Psychrobacter</i> phage pOW20-A          | <i>Myoviridae</i>            |
| MN166823     | 66.00 | 564   | 0.0129 | 0.0221 | 25500 | <i>Klebsiella</i> phage ST512-KPC3phi13.5   | <i>Myoviridae</i>            |
| MT664721     | 65.90 | 913   | 0.0208 | 0.0256 | 35700 | <i>Escherichia</i> phage vB_EcoM_APEC       | <i>Podoviridae</i>           |
| MN856093     | 60.50 | 721   | 0.0164 | 0.0544 | 13260 | <i>Myoviridae</i> sp.                       | <i>Myoviridae</i>            |
| AP014629     | 59.10 | 746   | 0.0170 | 0.0174 | 42840 | <i>Edwardsiella</i> phage GF-2              | <i>Gofduovirus</i>           |
| MH898687     | 59.00 | 746   | 0.0170 | 0.0183 | 40800 | <i>Edwardsiella</i> phage Edno5             | <i>Gofduovirus</i>           |
| MN856055     | 58.70 | 778   | 0.0177 | 0.0196 | 39780 | <i>Myoviridae</i> sp.                       | <i>Myoviridae</i>            |
| LR798197     | 58.60 | 609   | 0.0139 | 0.0146 | 41820 | uncultured <i>Caudovirales</i> phage        | <i>environmental samples</i> |
| MN855957     | 58.50 | 730   | 0.0166 | 0.0377 | 19380 | <i>Myoviridae</i> sp.                       | <i>Myoviridae</i>            |
| MN856004     | 58.13 | 2163  | 0.0493 | 0.0505 | 42840 | <i>Myoviridae</i> sp.                       | <i>Myoviridae</i>            |
| MN855951     | 58.00 | 745   | 0.0170 | 0.0913 | 8160  | <i>Siphoviridae</i> sp.                     | <i>Siphoviridae</i>          |
| MG592584     | 57.30 | 627   | 0.0143 | 0.0143 | 43860 | <i>Vibrio</i> phage 1.214.O._10N.222.54.F11 | <i>Siphoviridae</i>          |
| MG592398     | 56.90 | 630   | 0.0144 | 0.0144 | 43860 | <i>Vibrio</i> phage 1.013.O._10N.286.54.F9  | <i>Siphoviridae</i>          |
| MN856109     | 55.90 | 759   | 0.0173 | 0.1063 | 7140  | <i>Myoviridae</i> sp.                       | <i>Myoviridae</i>            |
