# Supplementary figures and images for: New Obolenskvirus Phages Brutus and Scipio: Biology, Evolution, and Phage-Host Interaction
Source: MDPI journal article supplement (doi:10.3390/ijms25042074), 2024-02-08

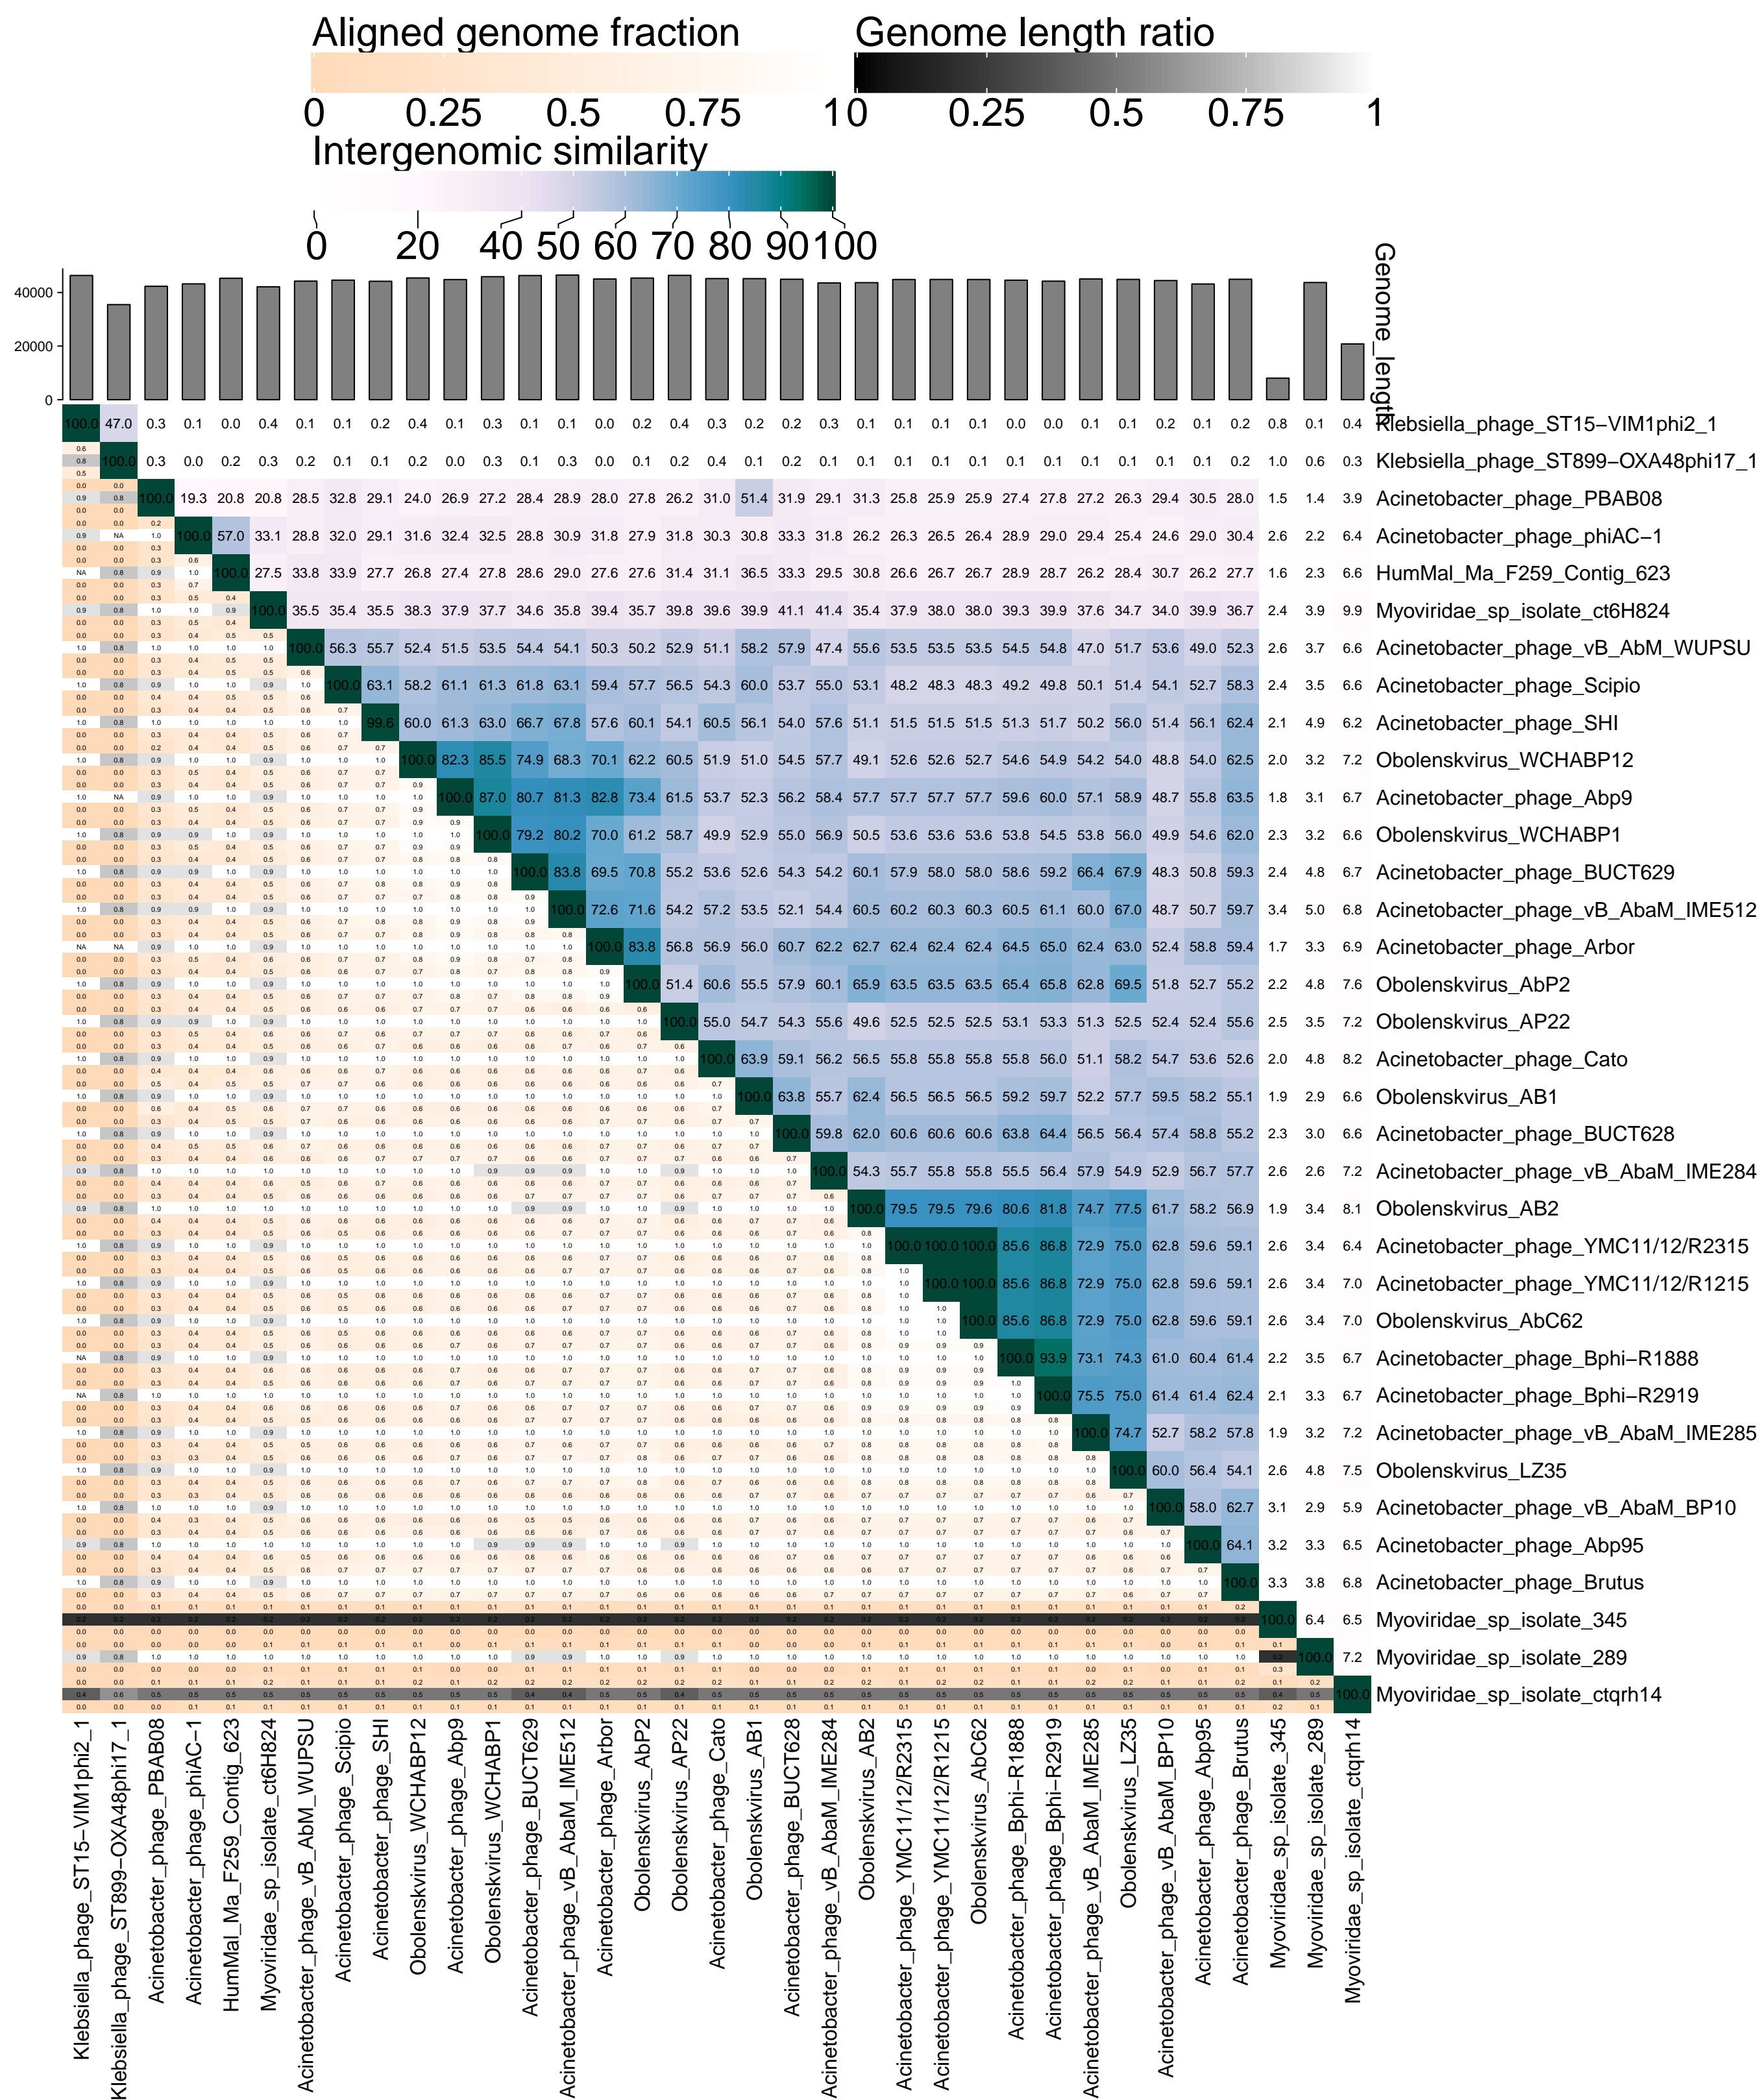

Supplement: s1 [file s1]
